# Supplementary material for: PfAgo-mediated a rapid and visual detection assay for PCV3 based on recombinase-aided amplification
Source: Research Square preprint supplement (doi:10.21203/rs.3.rs-6966274/v1), 2025-07-18
Supplement: Supplementary file 1 [file 057b2a1150ceab162931f67d.docx]

Supplementary Information

*Pf*Ago-mediated a rapid and visual detection assay for PCV3 based on recombinase-aided amplification

Xi-Meng Chena♀, Tao Wang a♀, Xian-Qin Jiaoa,b,c♀, Hong-bo Cuia, Jia-qi Zhanga, Lan-Lan Zhenga,b,c, Ping-Li Wang a,b,c*, Hong-Ying Chena,b,c*, Shi-Jie Maa,b,c*

aCollege of Veterinary Medicine, Henan Agricultural University, Zhengdong New District Longzi Lake 15#, Zhengzhou450046, PR China.

bHenan Province Key Laboratory for Animal Food Pathogens Surveillance, Zhengzhou 450046, PR China.

cMinistry of Education Key Laboratory for Animal Pathogens and Biosafety,Zhengzhou450046, PR China.

♀Xi-Meng Chen, Tao Wang and Xian-Qin Jiao contributed equally to this work.

***Corresponding author**: Hong-Ying Chen, E-mail: [chhy927@163.com](mailto:chhy927@163.com), Ping-Li Wang, [wplhnnd@henau.edu.cn](mailto:wplhnnd@henau.edu.cn) and Shi-jie Ma, E-mail: participate2006@126.com. Mailing address: College of Veterinary Medicine, Henan Agricultural University, Zhengdong New District Longzi Lake#15, 450046 Zhengzhou, Henan Province, People’s Republic of China. Tel: +86 371 55369208; fax: +86 371 55369208

**Supplementary Figure Legends**

**Figure S1.** Comparison of the 25 PCV3 Cap gene and the location of three sets of RAA primers on them.

**Figure S2.** Western blot analysis of the expressed *Pf*Ago protein.

**Figure S3.** Fluorescence background values at different probe concentrations.

**Figure S4.** The full uncropped Gels image of the for the best RAA primers of three pairs primers.

**Figure S5.** The full uncropped Gels image of the for different RAA incubation temperatures (37°C, 38°C, 39°C, 40°C, 41°C, and 42°C).

**Figure S6.** The full uncropped Gels image of the for different RAA incubation times (10, 20 and 30min).

**Figure S7.** The full uncropped Gels image of the for screening suitable single gDNA.

**Figure S8.** The full uncropped Blot image of the SDS-PAGE of the expressed *Pf*Ago protein.

**Figure S9.** The full uncropped Western Blot image of the expressed *Pf*Ago protein.

**Supplementary Table Legends**

**Table S1.** The sequences of primers, gDNAs, and probe utilized in this work.


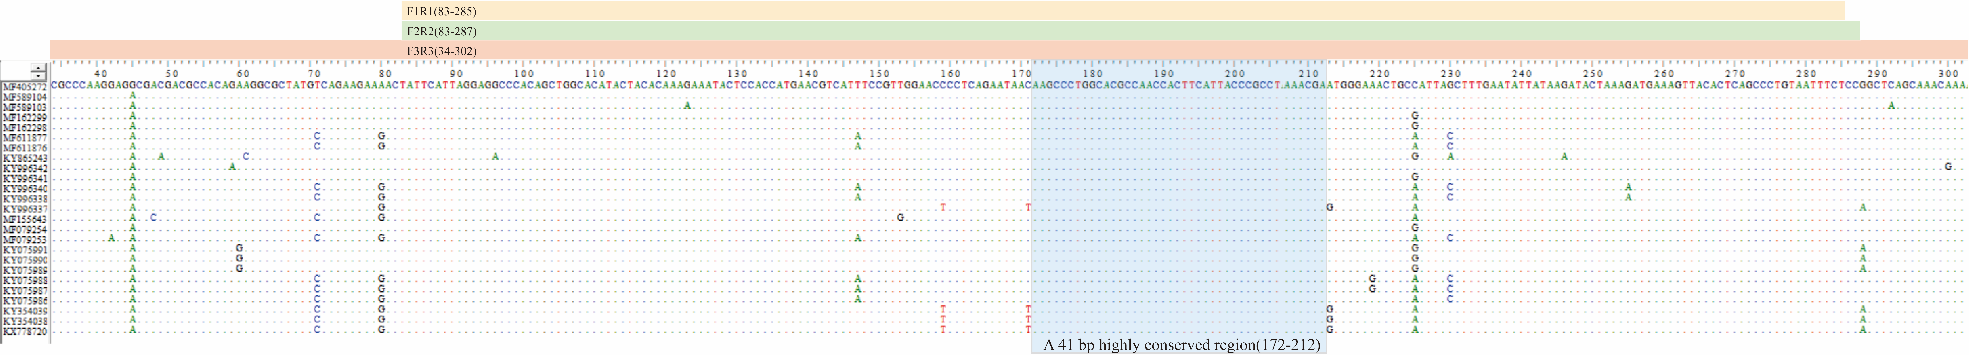
**Figure S1.** Comparison of the 25 PCV3 Cap gene and the location of three sets of RAA primers on them.


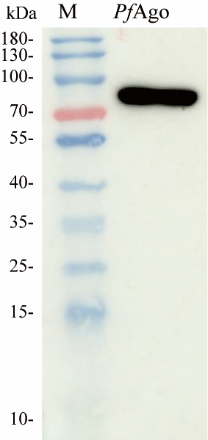


**Figure S2.** Western blot analysis of the expressed *Pf*Ago protein, with mouse anti-6 X His tag antibody as the primary antibody and goat anti-mouse IgG antibody as the secondary antibody. The unit of the numbers was kDa. Lane M: Marker.

**
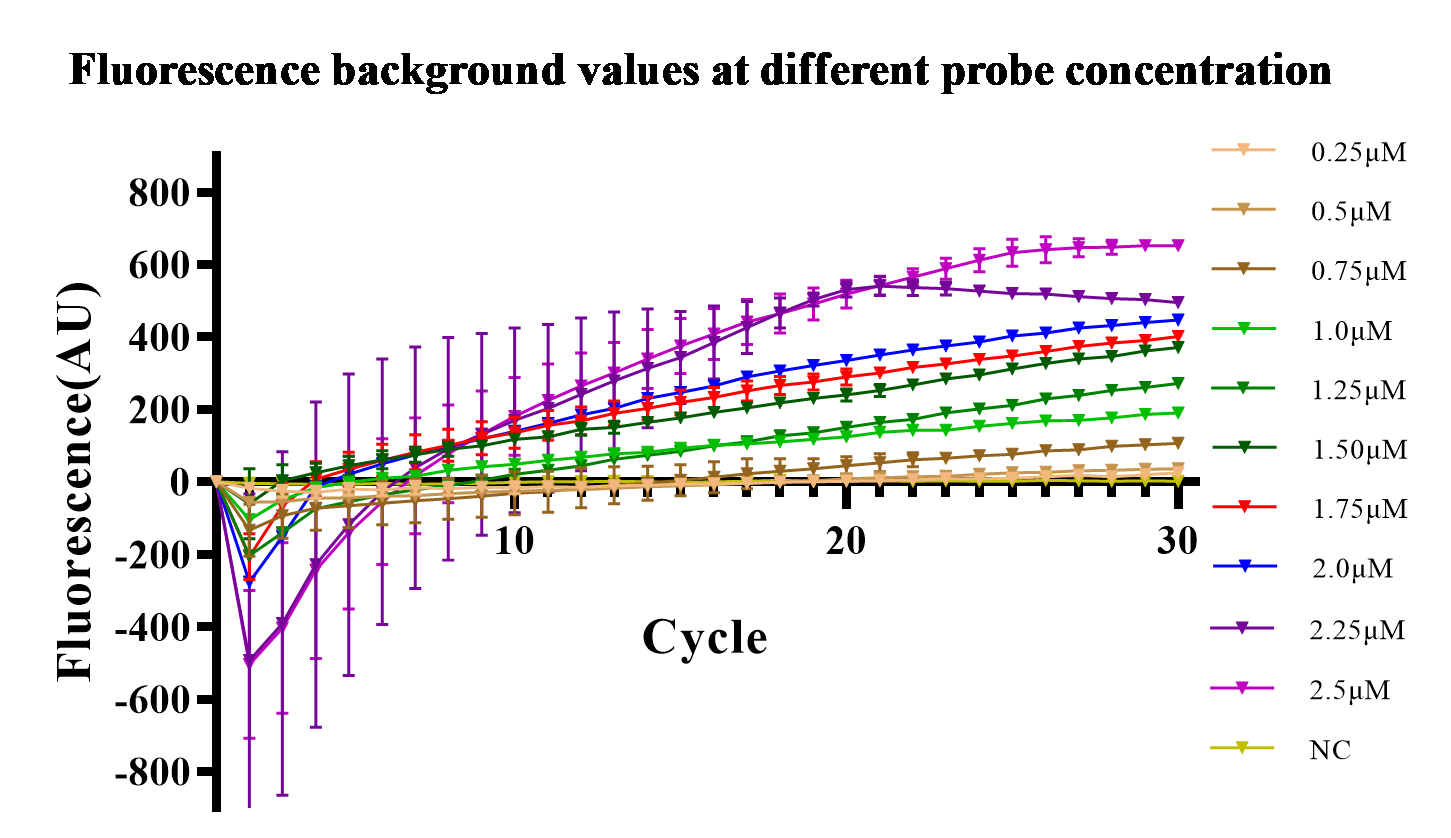
Figure S3.** Fluorescence background values ​​at different probe concentrations, which were subtracted in the experiment of optimizing the probe concentration.


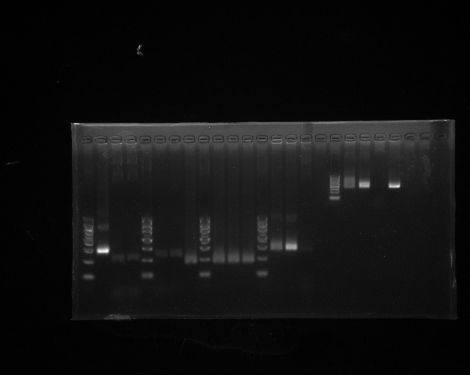


**Figure S4.** The full uncropped Gels image of the for the best RAA primers of three pairs primers.


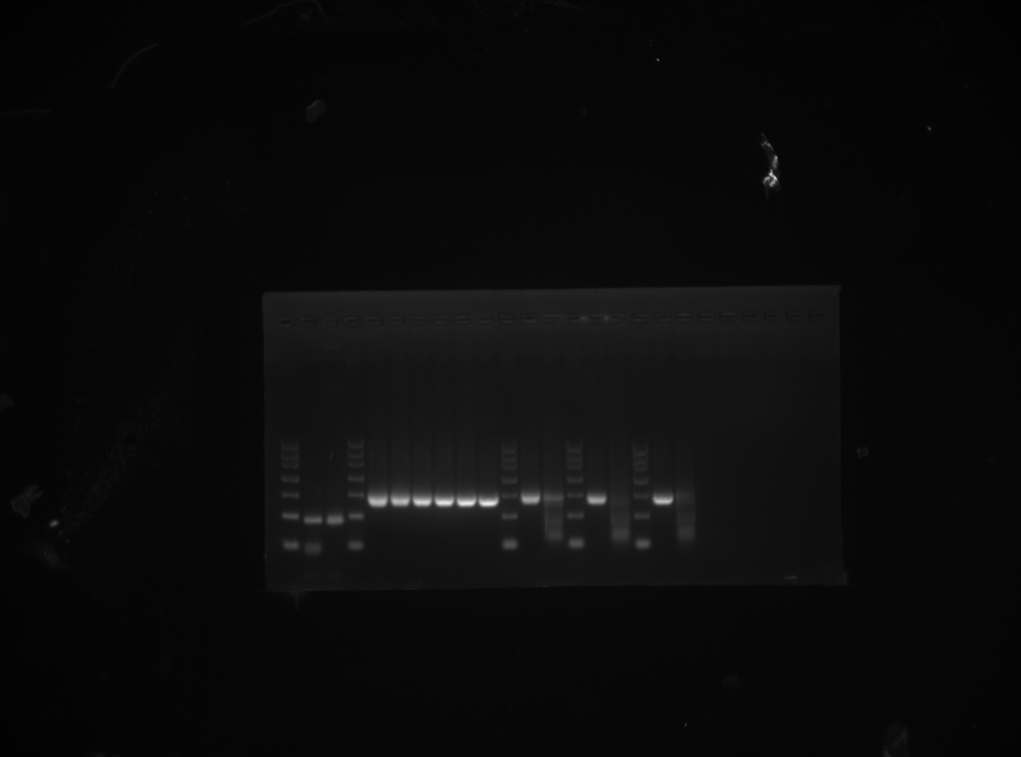


**Figure S5.** The full uncropped Gels image of the for different RAA incubation temperatures (37°C, 38°C, 39°C, 40°C, 41°C, and 42°C).





**Figure S6.** The full uncropped Gels image of the for different RAA incubation times (10, 20 and 30min).


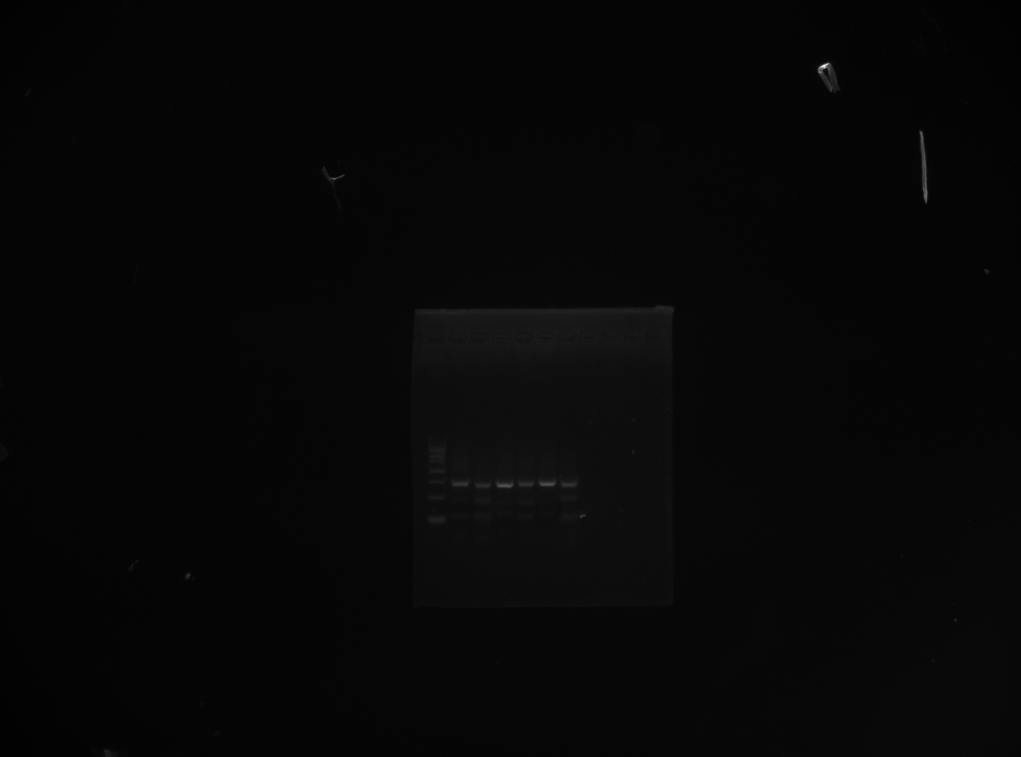


**Figure S7.** The full uncropped Gels image of the for screening suitable single gDNA.


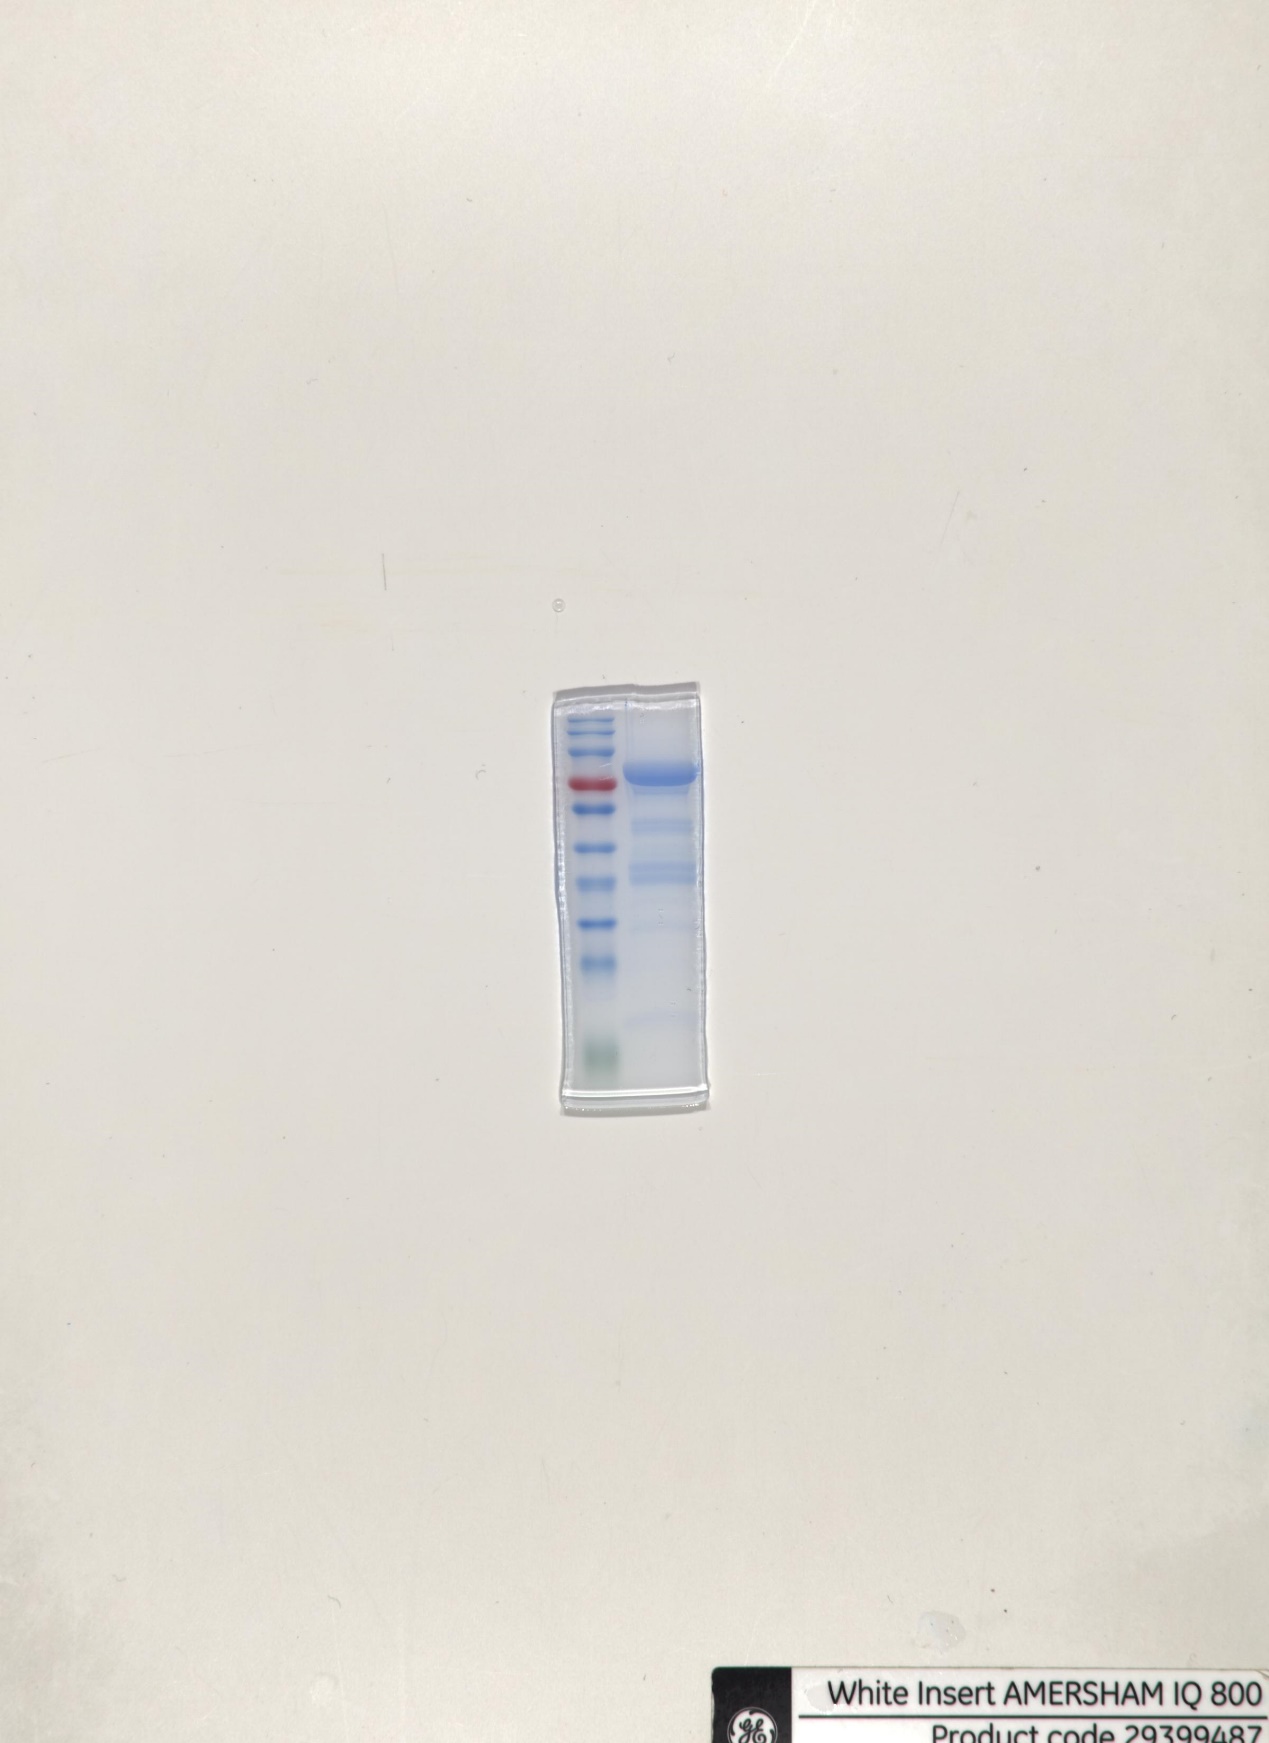


**Figure S8.** The full uncropped Blot image of the SDS-PAGE of the expressed *Pf*Ago protein.

**
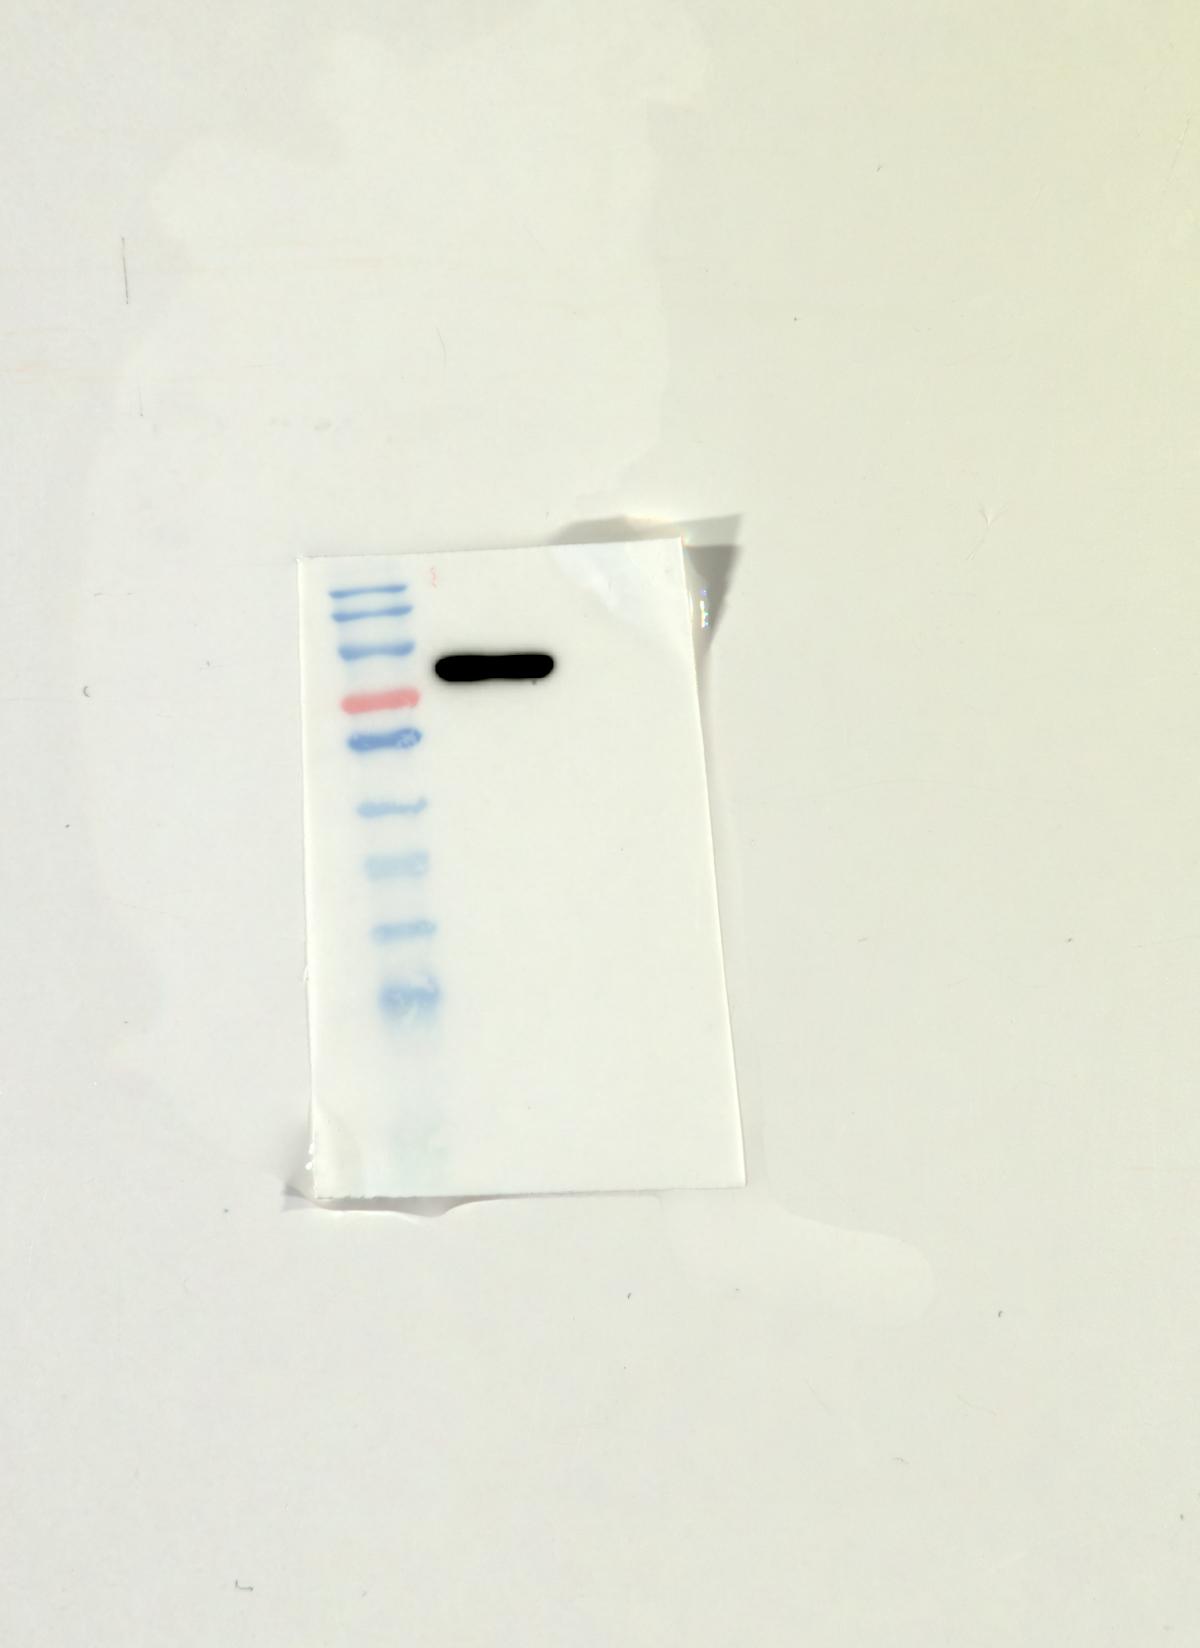
**

**Figure S9.** The full uncropped Western Blot image of the expressed *Pf*Ago protein.

**Table S1 The sequences of primers, gDNAs, and probe utilized in this work.**

| **Name** | **Nucleotide sequence (5’-3’)** | **Product size** |
| --- | --- | --- |
| **PCV3-F** | **TTAGAGAACGGACTTGTAAC** | **645** |
| **PCV3-R** | **ATGAGACACAGAGCTATATT** |
| RAA-F1 | TATTCATTAGGAGGCCCACAGCTGGCACAT | 205 |
| RAA-R1 | GGAGAAATTACAGGGCTGAGTGTAACTTTCATC |
| RAA-F2 | TATTCATTAGGAGGCCCACAGCTGGCACAT | 203 |
| RAA-R2 | AGAAATTACAGGGCTGAGTGTAACTTTCATCTTTAGT |
| **RAA-F3** | **TTTGTTTGCTGAGCCGGAGAAATTACAGGG** | **269** |
| **RAA-R3** | **CGCCCAAGGAGACGACGACGCCACAGAAGG** |
| gDNA1 | PHO-TAATGAAGTGGTTGGC |  |
| **gDNA2** | **PHO-****AGTGGTTGGCGTGCCA** |  |
| gDNA3 | PHO-ATGAAGTGGTTGGCGT |  |
| gDNA4 | PHO-TCGTTTAGGCGGGTAATGA |  |
| gDNA5 | PHO-GTTTAGGCGGGTAATG |  |
| **gDNA6** | **PHO-****TTTAGGCGGGTAATGA** |  |
| Probe Ⅰ | 5'-6-FAM-GGGTAATGAAGTGGTTGGC-BHQ1-3' |  |
| **Probe Ⅱ** | **5'-6-FAM-GTAATGAAGTGGTTGGC-BHQ1-3'** |  |
| **Probe Ⅱ-lfd** | **5'-6-FAM-GTAATGAAGTGGTTGGC-Biotin-3'** |  |

**Note:** The ones selected for use in the final test are highlighted in bold in the table.
